# Supplementary material for: Effect of Dapagliflozin on Total Heart Failure Events in Patients With Heart Failure With Mildly Reduced or Preserved Ejection Fraction: A Prespecified Analysis of the DELIVER Trial
Source: PubMed Central journal article supplement — JAMA Cardiol. 2023 Apr 26;8(6):554–63. doi: 10.1001/jamacardio.2023.0711 (PMC10134044; doi:10.1001/jamacardio.2023.0711), 2023-04-26

## Supplemental Online Content

Jhund PS, Claggett BL, Talebi A, et al. Effect of dapagliflozin on total heart failure events in patients with heart failure with mildly reduced or preserved ejection fraction: a prespecified analysis of the DELIVER trial. *JAMA Cardiol*. Published online April 26, 2023.  
doi:10.1001/jamacardio.2023.0711

**eFigure.** Effect of Dapagliflozin vs Placebo on Total HF Events and Cardiovascular Deaths, Showing the Interaction With Left Ventricular Ejection Fraction Modelled as a Restricted Cubic Spline From the Lin, Wei, Yang, and Ying (LWYY) Model

This supplementary material has been provided by the authors to give readers additional information about their work.

**eFigure.** Effect of Dapagliflozin vs Placebo on Total HF Events and Cardiovascular Deaths, Showing the Interaction With Left Ventricular Ejection Fraction Modelled as a Restricted Cubic Spline From the Lin, Wei, Yang, and Ying (LWYY) Model

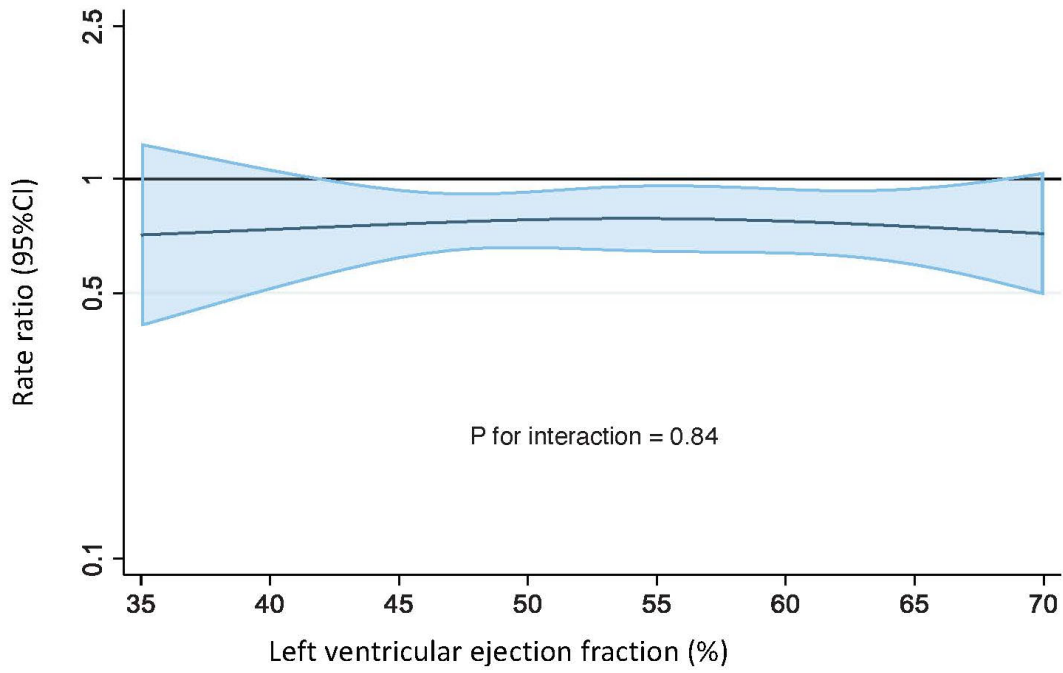

Supplement: jamacardiol-e230711-s003.pdf [file jamacardiol-e230711-s003.pdf]
