# Supplementary material for: Effect of Dapagliflozin on Total Heart Failure Events in Patients With Heart Failure With Mildly Reduced or Preserved Ejection Fraction: A Prespecified Analysis of the DELIVER Trial
Source: PubMed Central journal article supplement — JAMA Cardiol. 2023 Apr 26;8(6):554–63. doi: 10.1001/jamacardio.2023.0711 (PMC10134044; doi:10.1001/jamacardio.2023.0711), 2023-04-26
Supplement: jamacardiol-e230711-s004.pdf [file jamacardiol-e230711-s004.pdf]

## Data Sharing Statement

Jhund. Effect of Dapagliflozin on Total Heart Failure Events in Patients With Heart Failure With Mildly Reduced or Preserved Ejection Fraction. *JAMA Cardiol.* Published April 26, 2023.  
doi:10.1001/jamacardio.2023.0711

### Data

**Data available:** Yes

**Data types:** Other (please specify)

**Additional Information:** Data underlying the findings described in this manuscript may be obtained following AstraZeneca's data sharing policy described at <https://astrazenecagrouptrials.pharmacm.com/ST/Submission/Disclosure>.

**How to access data:** Data underlying the findings described in this manuscript may be obtained following AstraZeneca's data sharing policy described at <https://astrazenecagrouptrials.pharmacm.com/ST/Submission/Disclosure>.

**When available:** With publication

### Supporting Documents

**Document types:** None

### Additional Information

**Who can access the data:** Data underlying the findings described in this manuscript may be obtained following AstraZeneca's data sharing policy described at <https://astrazenecagrouptrials.pharmacm.com/ST/Submission/Disclosure>.

**Types of analyses:** Data underlying the findings described in this manuscript may be obtained following AstraZeneca's data sharing policy described at <https://astrazenecagrouptrials.pharmacm.com/ST/Submission/Disclosure>.

**Mechanisms of data availability:** Data underlying the findings described in this manuscript may be obtained following AstraZeneca's data sharing policy described at <https://astrazenecagrouptrials.pharmacm.com/ST/Submission/Disclosure>.

**Any additional restrictions:** Data underlying the findings described in this manuscript may be obtained following AstraZeneca's data sharing policy described at <https://astrazenecagrouptrials.pharmacm.com/ST/Submission/Disclosure>.
